# Supplementary material for: Exploring the Spatial-Temporal Microbiota of Compound Stomachs in a Pre-weaned Goat Model
Source: Front Microbiol. 2018 Aug 15;9:1846. doi: 10.3389/fmicb.2018.01846 (PMC6104157; doi:10.3389/fmicb.2018.01846)
Supplement: TABLE S3 — The OTU classification statistics of the negative control sample. [file Table_3.XLS]

## Sheet: OTU表
Table S3 The OTU classification statistics of negative control sample.
Domain	Kingdom	Phylum	Class	Order	Family	Genus	Species	OTU	NC1	NC3	NC4	NC5	SUM
d__Bacteria	k__norank	p__Proteobacteria	c__Alphaproteobacteria	o__Caulobacterales	f__Caulobacteraceae	g__Brevundimonas	s__Brevundimonas_nasdae	OTU195	0	10	0	19	29
d__Bacteria	k__norank	p__Bacteroidetes	c__Flavobacteriia	o__Flavobacteriales	f__Flavobacteriaceae	g__Polaribacter_4	s__unclassified_g__Polaribacter_4	OTU158	0	3	0	0	3
d__Bacteria	k__norank	p__Bacteroidetes	c__Flavobacteriia	o__Flavobacteriales	f__Flavobacteriaceae	g__Chryseobacterium	s__Chryseobacterium_anthropi	OTU161	0	11	4	0	15
d__Bacteria	k__norank	p__Actinobacteria	c__Actinobacteria	o__Corynebacteriales	f__Nocardiaceae	g__Rhodococcus	s__unclassified_g__Rhodococcus	OTU135	284	288	2	23	597
d__Bacteria	k__norank	p__Actinobacteria	c__Actinobacteria	o__Corynebacteriales	f__Corynebacteriaceae	g__Corynebacterium_1	s__unclassified_g__Corynebacterium_1	OTU159	0	3	0	0	3
d__Bacteria	k__norank	p__Firmicutes	c__Clostridia	o__Clostridiales	f__Clostridiaceae_1	g__Clostridium_sensu_stricto_7	s__Clostridium_novyi_NT	OTU154	0	32	0	0	32
d__Bacteria	k__norank	p__Firmicutes	c__Bacilli	o__Lactobacillales	f__Lactobacillaceae	g__Lactobacillus	s__unclassified_g__Lactobacillus	OTU17	50	0	0	0	50
d__Bacteria	k__norank	p__Proteobacteria	c__Gammaproteobacteria	o__Xanthomonadales	f__Xanthomonadales_Incertae_Sedis	g__norank_f__Xanthomonadales_Incertae_Sedis	s__Hypsibius_dujardini_g__norank_f__Xanthomonadales_Incertae_Sedis	OTU117	33	47	46	7	133
d__Bacteria	k__norank	p__Proteobacteria	c__Deltaproteobacteria	o__Desulfovibrionales	f__Desulfovibrionaceae	g__Bilophila	s__uncultured_bacterium_g__Bilophila	OTU25	56	0	0	0	56
d__Bacteria	k__norank	p__Proteobacteria	c__Epsilonproteobacteria	o__Campylobacterales	f__Helicobacteraceae	g__Helicobacter	s__Helicobacter_ganmani	OTU100	1	0	0	0	1
d__Bacteria	k__norank	p__Proteobacteria	c__Alphaproteobacteria	o__Rhodospirillales	f__Acetobacteraceae	g__Acidisoma	s__unclassified_g__Acidisoma	OTU175	0	0	10	0	10
d__Bacteria	k__norank	p__Bacteroidetes	c__Bacteroidia	o__Bacteroidales	f__Bacteroidales_S24-7_group	g__norank_f__Bacteroidales_S24-7_group	s__uncultured_bacterium_g__norank_f__Bacteroidales_S24-7_group	OTU143	24	15	0	0	39
d__Bacteria	k__norank	p__Firmicutes	c__Clostridia	o__Clostridiales	f__Family_XI_o__Clostridiales	g__Finegoldia	s__unclassified_g__Finegoldia	OTU23	6	0	0	0	6
d__Bacteria	k__norank	p__Proteobacteria	c__Betaproteobacteria	o__Burkholderiales	f__Comamonadaceae	g__Delftia	s__unclassified_g__Delftia	OTU20	7	0	0	0	7
d__Bacteria	k__norank	p__Bacteroidetes	c__Bacteroidia	o__Bacteroidales	f__Bacteroidaceae	g__Bacteroides	s__unclassified_g__Bacteroides	OTU22	18	0	0	0	18
d__Bacteria	k__norank	p__Bacteroidetes	c__Bacteroidia	o__Bacteroidales	f__Porphyromonadaceae	g__Parabacteroides	s__unclassified_g__Parabacteroides	OTU28	18	0	0	0	18
d__Bacteria	k__norank	p__Firmicutes	c__Clostridia	o__Clostridiales	f__Lachnospiraceae	g__Lachnospiraceae_NK4A136_group	s__unclassified_g__Lachnospiraceae_NK4A136_group	OTU9	21	0	0	0	21
d__Bacteria	k__norank	p__Chloroflexi	c__JG37-AG-4	o__norank_c__JG37-AG-4	f__norank_c__JG37-AG-4	g__norank_c__JG37-AG-4	s__unclassified_g__norank_c__JG37-AG-4	OTU4	24	0	0	0	24
d__Bacteria	k__norank	p__Bacteroidetes	c__Flavobacteriia	o__Flavobacteriales	f__Cryomorphaceae	g__norank_f__Cryomorphaceae	s__unclassified_g__norank_f__Cryomorphaceae	OTU148	0	4	0	0	4
d__Bacteria	k__norank	p__Proteobacteria	c__Gammaproteobacteria	o__Xanthomonadales	f__Xanthomonadaceae	g__Stenotrophomonas	s__Stenotrophomonas_maltophilia_R551-3	OTU80	7	4	17	3	31
d__Bacteria	k__norank	p__Bacteroidetes	c__Bacteroidia	o__Bacteroidales	f__Bacteroidaceae	g__Bacteroides	s__gut_metagenome_g__Bacteroides	OTU27	46	0	0	0	46
d__Bacteria	k__norank	p__Deinococcus-Thermus	c__Deinococci	o__Deinococcales	f__Deinococcaceae	g__Deinococcus	s__uncultured_organism_g__Deinococcus	OTU128	0	0	20	0	20
d__Bacteria	k__norank	p__Proteobacteria	c__Alphaproteobacteria	o__Rhizobiales	f__Phyllobacteriaceae	g__Mesorhizobium	s__Mesorhizobium_loti	OTU151	0	3	0	0	3
d__Bacteria	k__norank	p__Bacteroidetes	c__Bacteroidia	o__Bacteroidales	f__Bacteroidaceae	g__Bacteroides	s__unclassified_g__Bacteroides	OTU182	0	0	0	29	29
d__Bacteria	k__norank	p__Proteobacteria	c__Alphaproteobacteria	o__Rhizobiales	f__Bradyrhizobiaceae	g__Afipia	s__Afipia_felis__cat_scratch_disease_bacillus_	OTU93	200	237	567	335	1339
d__Bacteria	k__norank	p__Firmicutes	c__Clostridia	o__Clostridiales	f__Lachnospiraceae	g__unclassified_f__Lachnospiraceae	s__unclassified_f__Lachnospiraceae	OTU7	2	0	0	0	2
d__Bacteria	k__norank	p__Bacteroidetes	c__Bacteroidia	o__Bacteroidales	f__Bacteroidales_S24-7_group	g__norank_f__Bacteroidales_S24-7_group	s__unclassified_g__norank_f__Bacteroidales_S24-7_group	OTU1	1	0	0	0	1
d__Bacteria	k__norank	p__Proteobacteria	c__Betaproteobacteria	o__Hydrogenophilales	f__Hydrogenophilaceae	g__Tepidiphilus	s__Tepidiphilus_succinatimandens	OTU19	4	4	0	0	8
d__Bacteria	k__norank	p__Proteobacteria	c__Alphaproteobacteria	o__Rhodobacterales	f__Rhodobacteraceae	g__Rubellimicrobium	s__uncultured_bacterium_g__Rubellimicrobium	OTU190	0	0	0	11	11
d__Bacteria	k__norank	p__Firmicutes	c__Clostridia	o__Clostridiales	f__Family_XI_o__Clostridiales	g__Peptoniphilus	s__uncultured_organism_g__Peptoniphilus	OTU176	0	0	0	18	18
d__Bacteria	k__norank	p__Firmicutes	c__Clostridia	o__Clostridiales	f__Lachnospiraceae	g__Tyzzerella	s__uncultured_bacterium_g__Tyzzerella	OTU155	0	14	0	0	14
d__Bacteria	k__norank	p__Proteobacteria	c__Betaproteobacteria	o__Burkholderiales	f__Comamonadaceae	g__Simplicispira	s__unclassified_g__Simplicispira	OTU11	12	0	0	0	12
d__Bacteria	k__norank	p__Actinobacteria	c__Actinobacteria	o__Micrococcales	f__Intrasporangiaceae	g__norank_f__Intrasporangiaceae	s__uncultured_bacterium_g__norank_f__Intrasporangiaceae	OTU43	0	0	0	8	8
d__Bacteria	k__norank	p__Actinobacteria	c__Actinobacteria	o__Micrococcales	f__Micrococcaceae	g__unclassified_f__Micrococcaceae	s__unclassified_f__Micrococcaceae	OTU146	0	10	0	0	10
d__Bacteria	k__norank	p__Firmicutes	c__Bacilli	o__Bacillales	f__Staphylococcaceae	g__Staphylococcus	s__unclassified_g__Staphylococcus	OTU130	7	0	7	3	17
d__Bacteria	k__norank	p__Acidobacteria	c__Acidobacteria	o__norank_c__Acidobacteria	f__norank_c__Acidobacteria	g__norank_c__Acidobacteria	s__unclassified_g__norank_c__Acidobacteria	OTU137	0	20	0	0	20
d__Bacteria	k__norank	p__Actinobacteria	c__Actinobacteria	o__Propionibacteriales	f__Nocardioidaceae	g__Nocardioides	s__Nocardioides_sp._XZ17	OTU153	0	4	0	0	4
d__Bacteria	k__norank	p__Firmicutes	c__Clostridia	o__Clostridiales	f__Lachnospiraceae	g__Lachnospiraceae_XPB1014_group	s__uncultured_bacterium_g__Lachnospiraceae_XPB1014_group	OTU55	0	26	0	0	26
d__Bacteria	k__norank	p__Proteobacteria	c__Gammaproteobacteria	o__Pseudomonadales	f__Pseudomonadaceae	g__Pseudomonas	s__Pseudomonas_brenneri	OTU184	16	14	32	39	101
d__Bacteria	k__norank	p__Proteobacteria	c__Betaproteobacteria	o__Burkholderiales	f__Alcaligenaceae	g__MWH-UniP1_aquatic_group	s__unclassified_g__MWH-UniP1_aquatic_group	OTU132	0	5	0	0	5
d__Bacteria	k__norank	p__Acidobacteria	c__Acidobacteria	o__norank_c__Acidobacteria	f__norank_c__Acidobacteria	g__norank_c__Acidobacteria	s__uncultured_Saccharibacillus_sp.	OTU149	0	48	0	0	48
d__Bacteria	k__norank	p__Deinococcus-Thermus	c__Deinococci	o__Deinococcales	f__Deinococcaceae	g__Deinococcus	s__Deinococcus_sp._Lab-1	OTU138	0	6	0	0	6
d__Bacteria	k__norank	p__Proteobacteria	c__Gammaproteobacteria	o__Pseudomonadales	f__Moraxellaceae	g__Acinetobacter	s__unclassified_g__Acinetobacter	OTU145	0	3	0	0	3
d__Bacteria	k__norank	p__Proteobacteria	c__Gammaproteobacteria	o__Pseudomonadales	f__Moraxellaceae	g__Acinetobacter	s__unclassified_g__Acinetobacter	OTU140	0	30	2	0	32
d__Bacteria	k__norank	p__Firmicutes	c__Clostridia	o__Clostridiales	f__Lachnospiraceae	g__Blautia	s__Blautia_producta	OTU194	0	0	0	33	33
d__Bacteria	k__norank	p__Cyanobacteria	c__Cyanobacteria	o__norank_c__Cyanobacteria	f__norank_c__Cyanobacteria	g__norank_c__Cyanobacteria	s__unclassified_g__norank_c__Cyanobacteria	OTU166	0	6	0	0	6
d__Bacteria	k__norank	p__Firmicutes	c__Clostridia	o__Clostridiales	f__Ruminococcaceae	g__Oscillibacter	s__uncultured_bacterium_g__Oscillibacter	OTU10	18	0	0	0	18
d__Bacteria	k__norank	p__Bacteroidetes	c__Bacteroidia	o__Bacteroidales	f__Bacteroidaceae	g__Bacteroides	s__Bacteroides_dorei	OTU186	0	0	0	27	27
d__Bacteria	k__norank	p__Proteobacteria	c__Alphaproteobacteria	o__Rhizobiales	f__Hyphomicrobiaceae	g__Hyphomicrobium	s__uncultured_Hyphomicrobiaceae_bacterium_g__Hyphomicrobium	OTU5	36	0	0	0	36
d__Bacteria	k__norank	p__Bacteroidetes	c__Sphingobacteriia	o__Sphingobacteriales	f__Chitinophagaceae	g__Vibrionimonas	s__uncultured_bacterium_g__Vibrionimonas	OTU169	5	0	23	6	34
d__Bacteria	k__norank	p__Saccharibacteria	c__norank_p__Saccharibacteria	o__norank_p__Saccharibacteria	f__norank_p__Saccharibacteria	g__norank_p__Saccharibacteria	s__uncultured_bacterium_SBR2013	OTU177	0	0	0	55	55
d__Bacteria	k__norank	p__Proteobacteria	c__Alphaproteobacteria	o__Rickettsiales	f__Anaplasmataceae	g__Wolbachia	s__uncultured_alpha_proteobacterium_g__Wolbachia	OTU12	27	0	0	0	27
d__Bacteria	k__norank	p__Nitrospirae	c__Nitrospira	o__norank_c__Nitrospira	f__norank_c__Nitrospira	g__Nitrospira	s__uncultured_Pseudomonas_sp._g__Nitrospira	OTU147	0	8	0	0	8
d__Bacteria	k__norank	p__Firmicutes	c__Clostridia	o__Clostridiales	f__Family_XVIII	g__Caldinitratiruptor	s__Caldinitratiruptor_microaerophilus	OTU171	0	0	7	0	7
d__Bacteria	k__norank	p__Proteobacteria	c__Alphaproteobacteria	o__Rhizobiales	f__Methylobacteriaceae	g__Methylobacterium	s__Methylobacterium_adhaesivum_g__Methylobacterium	OTU174	0	0	9	0	9
d__Bacteria	k__norank	p__Actinobacteria	c__Actinobacteria	o__Corynebacteriales	f__Corynebacteriaceae	g__Corynebacterium_1	s__Corynebacterium_ureicelerivorans	OTU37	0	3	0	0	3
d__Bacteria	k__norank	p__Proteobacteria	c__Gammaproteobacteria	o__Pseudomonadales	f__Pseudomonadaceae	g__Pseudomonas	s__unclassified_g__Pseudomonas	OTU111	28	56	139	112	335
d__Bacteria	k__norank	p__Deinococcus-Thermus	c__Deinococci	o__Deinococcales	f__Deinococcaceae	g__Deinococcus	s__Deinococcus_sp._G8_2015_	OTU172	0	0	52	0	52
d__Bacteria	k__norank	p__Bacteroidetes	c__Cytophagia	o__Cytophagales	f__Cyclobacteriaceae	g__norank_f__Cyclobacteriaceae	s__uncultured_Hongiella_sp.	OTU133	0	7	0	0	7
d__Bacteria	k__norank	p__Proteobacteria	c__Alphaproteobacteria	o__Rhizobiales	f__Methylobacteriaceae	g__Methylobacterium	s__Methylobacterium_aquaticum	OTU8	5	0	0	0	5
d__Bacteria	k__norank	p__Firmicutes	c__Clostridia	o__Clostridiales	f__Ruminococcaceae	g__Faecalibacterium	s__unclassified_g__Faecalibacterium	OTU3	19	0	0	0	19
d__Bacteria	k__norank	p__Proteobacteria	c__Gammaproteobacteria	o__Pseudomonadales	f__Moraxellaceae	g__Psychrobacter	s__Psychrobacter_cibarius	OTU13	1	0	0	0	1
d__Bacteria	k__norank	p__Firmicutes	c__Clostridia	o__Clostridiales	f__Lachnospiraceae	g__unclassified_f__Lachnospiraceae	s__unclassified_f__Lachnospiraceae	OTU141	0	9	0	0	9
d__Bacteria	k__norank	p__Proteobacteria	c__Betaproteobacteria	o__Burkholderiales	f__Comamonadaceae	g__unclassified_f__Comamonadaceae	s__unclassified_f__Comamonadaceae	OTU15	21	0	0	0	21
d__Bacteria	k__norank	p__Proteobacteria	c__Alphaproteobacteria	o__Rhodobacterales	f__Rhodobacteraceae	g__unclassified_f__Rhodobacteraceae	s__unclassified_f__Rhodobacteraceae	OTU191	0	0	0	32	32
d__Bacteria	k__norank	p__Proteobacteria	c__Alphaproteobacteria	o__Rhodobacterales	f__Rhodobacteraceae	g__Paracoccus	s__unclassified_g__Paracoccus	OTU192	14	0	0	12	26
d__Bacteria	k__norank	p__Proteobacteria	c__Alphaproteobacteria	o__Rhodospirillales	f__Rhodospirillaceae	g__unclassified_f__Rhodospirillaceae	s__unclassified_f__Rhodospirillaceae	OTU157	0	23	0	0	23
d__Bacteria	k__norank	p__Actinobacteria	c__Actinobacteria	o__Corynebacteriales	f__Corynebacteriaceae	g__Corynebacterium_1	s__Corynebacterium_imitans	OTU122	3	0	0	0	3
d__Bacteria	k__norank	p__Bacteroidetes	c__Sphingobacteriia	o__Sphingobacteriales	f__Chitinophagaceae	g__Segetibacter	s__unclassified_g__Segetibacter	OTU181	0	0	0	4	4
d__Bacteria	k__norank	p__Acidobacteria	c__Acidobacteria	o__Blastocatellales	f__Blastocatellaceae__Subgroup_4_	g__Blastocatella	s__unclassified_g__Blastocatella	OTU193	0	0	0	12	12
d__Bacteria	k__norank	p__Bacteroidetes	c__Bacteroidia	o__Bacteroidales	f__Rikenellaceae	g__Alistipes	s__unclassified_g__Alistipes	OTU142	0	24	0	0	24
d__Bacteria	k__norank	p__Proteobacteria	c__Alphaproteobacteria	o__Rhizobiales	f__Bradyrhizobiaceae	g__Nitrobacter	s__uncultured_Paracoccus_sp._g__Nitrobacter	OTU188	0	4	0	6	10
d__Bacteria	k__norank	p__Proteobacteria	c__Alphaproteobacteria	o__Rhodobacterales	f__Rhodobacteraceae	g__unclassified_f__Rhodobacteraceae	s__unclassified_f__Rhodobacteraceae	OTU160	0	3	0	0	3
d__Bacteria	k__norank	p__Proteobacteria	c__Gammaproteobacteria	o__Pseudomonadales	f__Pseudomonadaceae	g__Pseudomonas	s__Pseudomonas_psychrophila	OTU139	1	12	1	1	15
d__Bacteria	k__norank	p__Proteobacteria	c__Gammaproteobacteria	o__Pseudomonadales	f__Moraxellaceae	g__Enhydrobacter	s__Moraxella_osloensis_g__Enhydrobacter	OTU26	40	13	3	41	97
d__Bacteria	k__norank	p__Proteobacteria	c__Alphaproteobacteria	o__SAR11_clade	f__norank_o__SAR11_clade	g__norank_o__SAR11_clade	s__unclassified_g__norank_o__SAR11_clade	OTU168	0	10	0	0	10
d__Bacteria	k__norank	p__Bacteroidetes	c__Flavobacteriia	o__Flavobacteriales	f__Flavobacteriaceae	g__Chryseobacterium	s__unclassified_g__Chryseobacterium	OTU173	0	0	18	0	18
d__Bacteria	k__norank	p__Firmicutes	c__Clostridia	o__Clostridiales	f__Ruminococcaceae	g__Ruminiclostridium	s__[Clostridium]_leptum_g__Ruminiclostridium	OTU164	11	21	0	0	32
d__Bacteria	k__norank	p__Proteobacteria	c__Gammaproteobacteria	o__Enterobacteriales	f__Enterobacteriaceae	g__Escherichia-Shigella	s__unclassified_g__Escherichia-Shigella	OTU185	54	63	76	111	304
d__Bacteria	k__norank	p__Actinobacteria	c__Actinobacteria	o__Propionibacteriales	f__Propionibacteriaceae	g__Propionibacterium	s__Propionibacterium_acnes_subsp._acnes_g__Propionibacterium	OTU24	6	2	27	21	56
d__Bacteria	k__norank	p__Chloroflexi	c__TK10	o__norank_c__TK10	f__norank_c__TK10	g__norank_c__TK10	s__unclassified_g__norank_c__TK10	OTU152	0	14	0	0	14
d__Bacteria	k__norank	p__Bacteroidetes	c__Bacteroidia	o__Bacteroidales	f__Prevotellaceae	g__Prevotella_7	s__Prevotella_sp._oral_taxon_306_str._F0472	OTU179	0	0	0	24	24
d__Bacteria	k__norank	p__Proteobacteria	c__Gammaproteobacteria	o__Xanthomonadales	f__Solimonadaceae	g__unclassified_f__Solimonadaceae	s__unclassified_f__Solimonadaceae	OTU163	0	6	0	0	6
d__Bacteria	k__norank	p__Chloroflexi	c__Ktedonobacteria	o__Ktedonobacterales	f__HSB_OF53-F07	g__norank_f__HSB_OF53-F07	s__unclassified_g__norank_f__HSB_OF53-F07	OTU136	0	10	0	0	10
d__Bacteria	k__norank	p__Latescibacteria	c__norank_p__Latescibacteria	o__norank_p__Latescibacteria	f__norank_p__Latescibacteria	g__norank_p__Latescibacteria	s__uncultured_Acidobacteria_bacterium_g__norank_p__Latescibacteria	OTU167	0	15	0	0	15
d__Bacteria	k__norank	p__Proteobacteria	c__Betaproteobacteria	o__Burkholderiales	f__Comamonadaceae	g__Pseudorhodoferax	s__uncultured_beta_proteobacterium_g__Pseudorhodoferax	OTU178	1	0	1	6	8
d__Bacteria	k__norank	p__unclassified_k__norank	c__unclassified_k__norank	o__unclassified_k__norank	f__unclassified_k__norank	g__unclassified_k__norank	s__unclassified_k__norank	OTU2	20	0	0	0	20
d__Bacteria	k__norank	p__Firmicutes	c__Bacilli	o__Lactobacillales	f__Lactobacillaceae	g__Lactobacillus	s__unclassified_g__Lactobacillus	OTU150	4	6	0	0	10
d__Bacteria	k__norank	p__Actinobacteria	c__Actinobacteria	o__Propionibacteriales	f__Propionibacteriaceae	g__Propionibacterium	s__Propionibacterium_avidum_44067	OTU29	9	0	0	0	9
d__Bacteria	k__norank	p__unclassified_k__norank	c__unclassified_k__norank	o__unclassified_k__norank	f__unclassified_k__norank	g__unclassified_k__norank	s__unclassified_k__norank	OTU6	18	0	0	0	18
d__Bacteria	k__norank	p__Bacteroidetes	c__Flavobacteriia	o__Flavobacteriales	f__Flavobacteriaceae	g__Flavobacterium	s__unclassified_g__Flavobacterium	OTU156	0	11	0	0	11
d__Bacteria	k__norank	p__Bacteroidetes	c__Bacteroidia	o__Bacteroidales	f__Bacteroidales_S24-7_group	g__norank_f__Bacteroidales_S24-7_group	s__uncultured_bacterium_g__norank_f__Bacteroidales_S24-7_group	OTU14	62	0	0	0	62
d__Bacteria	k__norank	p__Proteobacteria	c__Gammaproteobacteria	o__Enterobacteriales	f__Enterobacteriaceae	g__Serratia	s__unclassified_g__Serratia	OTU189	0	0	0	17	17
d__Bacteria	k__norank	p__Firmicutes	c__Clostridia	o__Clostridiales	f__Lachnospiraceae	g__Lachnospiraceae_NK4A136_group	s__unclassified_g__Lachnospiraceae_NK4A136_group	OTU16	16	0	0	0	16
d__Bacteria	k__norank	p__Spirochaetae	c__Spirochaetes	o__Spirochaetales	f__Leptospiraceae	g__Leptospira	s__Leptospira_broomii	OTU170	9	12	60	10	91
d__Bacteria	k__norank	p__Proteobacteria	c__Gammaproteobacteria	o__Enterobacteriales	f__Enterobacteriaceae	g__Raoultella	s__unclassified_g__Raoultella	OTU187	42	69	111	150	372
d__Bacteria	k__norank	p__Bacteroidetes	c__Bacteroidia	o__Bacteroidales	f__Bacteroidales_S24-7_group	g__norank_f__Bacteroidales_S24-7_group	s__uncultured_Bacteroidales_bacterium_g__norank_f__Bacteroidales_S24-7_group	OTU162	0	14	0	0	14
d__Bacteria	k__norank	p__Actinobacteria	c__Actinobacteria	o__Corynebacteriales	f__Corynebacteriaceae	g__Corynebacterium_1	s__Corynebacterium_tuberculostearicum	OTU119	0	19	0	6	25
d__Bacteria	k__norank	p__Actinobacteria	c__Actinobacteria	o__Gaiellales	f__Gaiellaceae	g__Gaiella	s__uncultured_Rubrobacterales_bacterium_g__Gaiella	OTU134	0	14	0	0	14
d__Bacteria	k__norank	p__Firmicutes	c__Clostridia	o__Clostridiales	f__Clostridiales_vadinBB60_group	g__norank_f__Clostridiales_vadinBB60_group	s__Clostridiales_bacterium_canine_oral_taxon_260	OTU180	0	0	0	3	3
d__Bacteria	k__norank	p__Proteobacteria	c__Betaproteobacteria	o__Burkholderiales	f__Alcaligenaceae	g__Achromobacter	s__unclassified_g__Achromobacter	OTU183	31	84	126	127	368
d__Bacteria	k__norank	p__Actinobacteria	c__Actinobacteria	o__unclassified_c__Actinobacteria	f__unclassified_c__Actinobacteria	g__unclassified_c__Actinobacteria	s__unclassified_c__Actinobacteria	OTU165	0	3	0	0	3
d__Bacteria	k__norank	p__Proteobacteria	c__Gammaproteobacteria	o__Pseudomonadales	f__Pseudomonadaceae	g__Pseudomonas	s__unclassified_g__Pseudomonas	OTU129	32	42	64	113	251
d__Bacteria	k__norank	p__Bacteroidetes	c__Bacteroidia	o__Bacteroidales	f__unclassified_o__Bacteroidales	g__unclassified_o__Bacteroidales	s__unclassified_o__Bacteroidales	OTU18	20	0	0	0	20
d__Bacteria	k__norank	p__Cyanobacteria	c__Cyanobacteria	o__SubsectionIII	f__FamilyI_o__SubsectionIII	g__Microcoleus	s__unclassified_g__Microcoleus	OTU21	34	0	0	0	34
